# Supplementary material for: Prognostic Value of the Albumin-to-Alkaline Phosphatase Ratio for All-Cause Mortality in Older Patients Initiating Hemodialysis: A Multicenter Cohort Study
Source: Research Square preprint supplement (doi:10.21203/rs.3.rs-8618116/v1), 2026-02-12
Supplement: Supplementary file 1 [file bf77a4bcd58448160d7a8983.docx]

**Supplementary table 1. Comparison of baseline clinical variables between survivors and non-survivors in elderly hemodialysis patients.**

| **Variables** | **Survivors**  **(n = 793)** | **Non-survivors**  **(n = 1197)** | *P***value** |
| --- | --- | --- | --- |
| AAPR | 0.406 ± 0.311 | 0.349 ± 0.277 | < 0.001 |
| Age (years) | 76.5 ± 4.9 | 78.0 ± 5.5 | < 0.001 |
| Sex (male, n(%)) | 426 (53.7) | 683 (57.1) | 0.142 |
| BMI (kg/m2) | 23.6 ± 3.8 | 23.0 ± 3.9 | < 0.001 |
| **Etiology of CKD (n, %)** |  |  | 0.038 |
| Diabetic nephropathy | 355 (45.2) | 608 (51.2) |  |
| Glomerulonephritis | 69 (8.8) | 82 (6.9) |  |
| Hypertensive nephropathy | 210 (26.7) | 274 (23.1) |  |
| Other | 152 (19.3) | 224 (18.9) |  |
| **Comorbidities (n, %)** |  |  |  |
| DM | 430 (54.2) | 728 (60.9) | 0.003 |
| HTN | 707 (89.2) | 1079 (90.3) | 0.407 |
| CVD | 344 (43.4) | 612 (51.1) | < 0.001 |
| Liver cirrhosis | 20 (2.5) | 42 (3.5) | 0.215 |
| Malignancy | 99 (12.5) | 186 (15.5) | 0.057 |
| **Type of vascular access (n, %)** |  |  | < 0.001 |
| Hemodialysis catheter | 71 (9.1) | 214 (18.1) |  |
| AVF | 575 (73.6) | 756 (63.8) |  |
| AVG | 135 (17.3) | 215 (18.1) |  |
| **Laboratory parameters** |  |  |  |
| WBC (103/mm3) | 8.8 ± 21.9 | 9.0 ± 6.8 | < 0.001 |
| Hb (g/dL) | 9.2 ± 1.7 | 9.8 ± 1.7 | 0.573 |
| BUN (mg/dL) | 80.0 ± 33.4 | 79.5 ± 35.5 | 0.725 |
| Creatinine (mg/dL) | 6.9 ± 2.9 | 6.4 ± 2.8 | < 0.001 |
| eGFR (ml/min/1.73m2) | 8.7 ± 7.0 | 9.5 ± 7.4 | 0.002 |
| Albumin (g/dL) | 3.5 ± 0.6 | 3.3 ± 0.6 | < 0.001 |
| ALP (IU/L) | 134.8 ± 112.9 | 157.4 ± 139.7 | < 0.001 |
| Uric acid (mg/dL) | 7.6 ± 2.6 | 7.9 ± 2.9 | 0.055 |
| Corrected calcium (mg/dL) | 8.5 ± 1.3 | 8.6 ± 1.3 | < 0.001 |
| Phosphorus (mg/dL) | 5.1 ± 1.7 | 4.9 ± 1.7 | 0.002 |
| iPTH (pg/mL) | 219.7 ± 189.4 | 183.8 ± 187.5 | < 0.001 |
| **Medications (n, %)** |  |  |  |
| RASBs | 422 (53.3) | 631 (52.7) | 0.804 |
| BBs | 316 (39.9) | 483 (40.4) | 0.841 |
| CCBs | 517 (65.3) | 689 (57.6) | 0.001 |
| Diuretics | 471 (59.5) | 728 (60.9) | 0.532 |
| Statins | 315 (39.8) | 428 (35.8) | 0.07 |
| Calcium based phosphate binders | 310 (39.1) | 462 (38.6) | 0.807 |

*Abbreviations: AAPR, albumin to alkaline phosphatase ratio; BMI, body mass index; CKD, chronic kidney disease; DM, diabetes mellitus; HTN, hypertension; CVD, cardiovascular disease; AVF, arteriovenous fistula; AVG, arteriovenous graft; Hb, hemoglobin; BUN, blood urea nitrogen; eGFR, estimated glomerular filtration rate; ALP, alkaline phosphatase; iPTH, intact parathyroid hormone; RASBs, renin-angiotensin system blockades; BBs, beta-blockers; CCBs, calcium-channel blockers.

**Supplementary table 2.** **Univariate Cox proportional hazards analysis for all-cause mortality in elderly hemodialysis patients.**

| **Variables** | **Univariate analysis** | |
| --- | --- | --- |
| **HRs (95% CI)** | ***P* value** |
| Age (years) | 1.05 (1.04-1.06) | < 0.001 |
| Sex (male, n(%)) | 1.11 (0.99-1.24) | 0.076 |
| BMI (kg/m2) | 0.97 (0.96-0.99) | < 0.001 |
| DM | 1.20 (1.07-1.35) | 0.002 |
| HTN | 1.02 (0.84-1.23) | 0.869 |
| CVD | 1.34 (1.12-1.50) | < 0.001 |
| Liver cirrhosis | 1.41 (1.03-1.91) | 0.03 |
| Malignancy | 1.24 (1.06-1.45) | 0.007 |
| Type of vascular access (n, %) |  | < 0.001 |
| Hemodialysis catheter | 1 |  |
| AVF | 0.47 (0.40-0.55) |  |
| AVG | 0.57 (0.47-0.68) |  |
| WBC (103/mm3) | 1.00 (1.00-1.00) | 0.651 |
| Hb (g/dL) | 1.01 (0.98-1.05) | 0.462 |
| BUN (mg/dL) | 1.00 (0.99-1.00) | 0.257 |
| Creatinine (mg/dL) | 0.94 (0.92-0.96) | < 0.001 |
| eGFR (ml/min/1.73m2) | 1.02 (1.01-1.02) | < 0.001 |
| Albumin (g/dL) | 0.67 (0.61-0.73) | < 0.001 |
| ALP (IU/L) | 1.00 (1.00-1.00) | 0.01 |
| Uric acid (mg/dL) | 1.02 (1.00-1.05) | 0.043 |
| Corrected calcium (mg/dL) | 1.09 (1.04-1.15) | 0.001 |
| Phosphorus (mg/dL) | 0.93 (0.90-0.97) | < 0.001 |
| iPTH (pg/mL) | 1.00 (0.99-1.00) | < 0.001 |
| RASB | 0.91 (0.81-1.01) | 0.086 |
| BB | 1.02 (0.91-1.14) | 0.793 |
| CCB | 0.79 (0.70-0.88) | < 0.001 |
| Diuretics | 1.03 (0.92-1.16) | 0.599 |
| Statin | 0.92 (0.81-1.03) | 0.146 |
| Calcium based phosphate binder | 0.88 (0.78-0.98) | 0.025 |

*Abbreviations: HR, hazard ratio; CI, confidence interval; AAPR, albumin to alkaline phosphatase ratio; BMI, body mass index; CKD, chronic kidney disease; DM, diabetes mellitus; HTN, hypertension; CVD, cardiovascular disease; AVF, arteriovenous fistula; AVG, arteriovenous graft; Hb, hemoglobin; BUN, blood urea nitrogen; eGFR, estimated glomerular filtration rate; ALP, alkaline phosphatase; iPTH, intact parathyroid hormone; RASBs, renin-angiotensin system blockades; BB, beta-blockers; CCB, calcium-channel blockers.
